# Supplementary material for: Half-sandwich rhodium and iridium complexes containing homochiral imidazolyl-imine ligands: synthesis, characterization and catalytic applications
Source: Royal Society of Chemistry journal article supplement (doi:10.1039/c3dt51222c), 2013-01-01

## Supporting Information

### **Half-sandwich rhodium and iridium complexes containing homoquiral imidazolyl-imine ligands: synthesis, characterization and catalytic applications**

**Alexandra Becerra, Raúl Contreras, Daniel Carmona, Fernando J. Lahoz, and Pilar García-Orduña**

**$^1\text{H}$  NMR data, at low temperature, in the HN=C region for the aqua-complexes 7-12**

Complex **7**,  $^1\text{H}$ , 300 MHz,  $\text{CD}_2\text{Cl}_2$ , 183 K

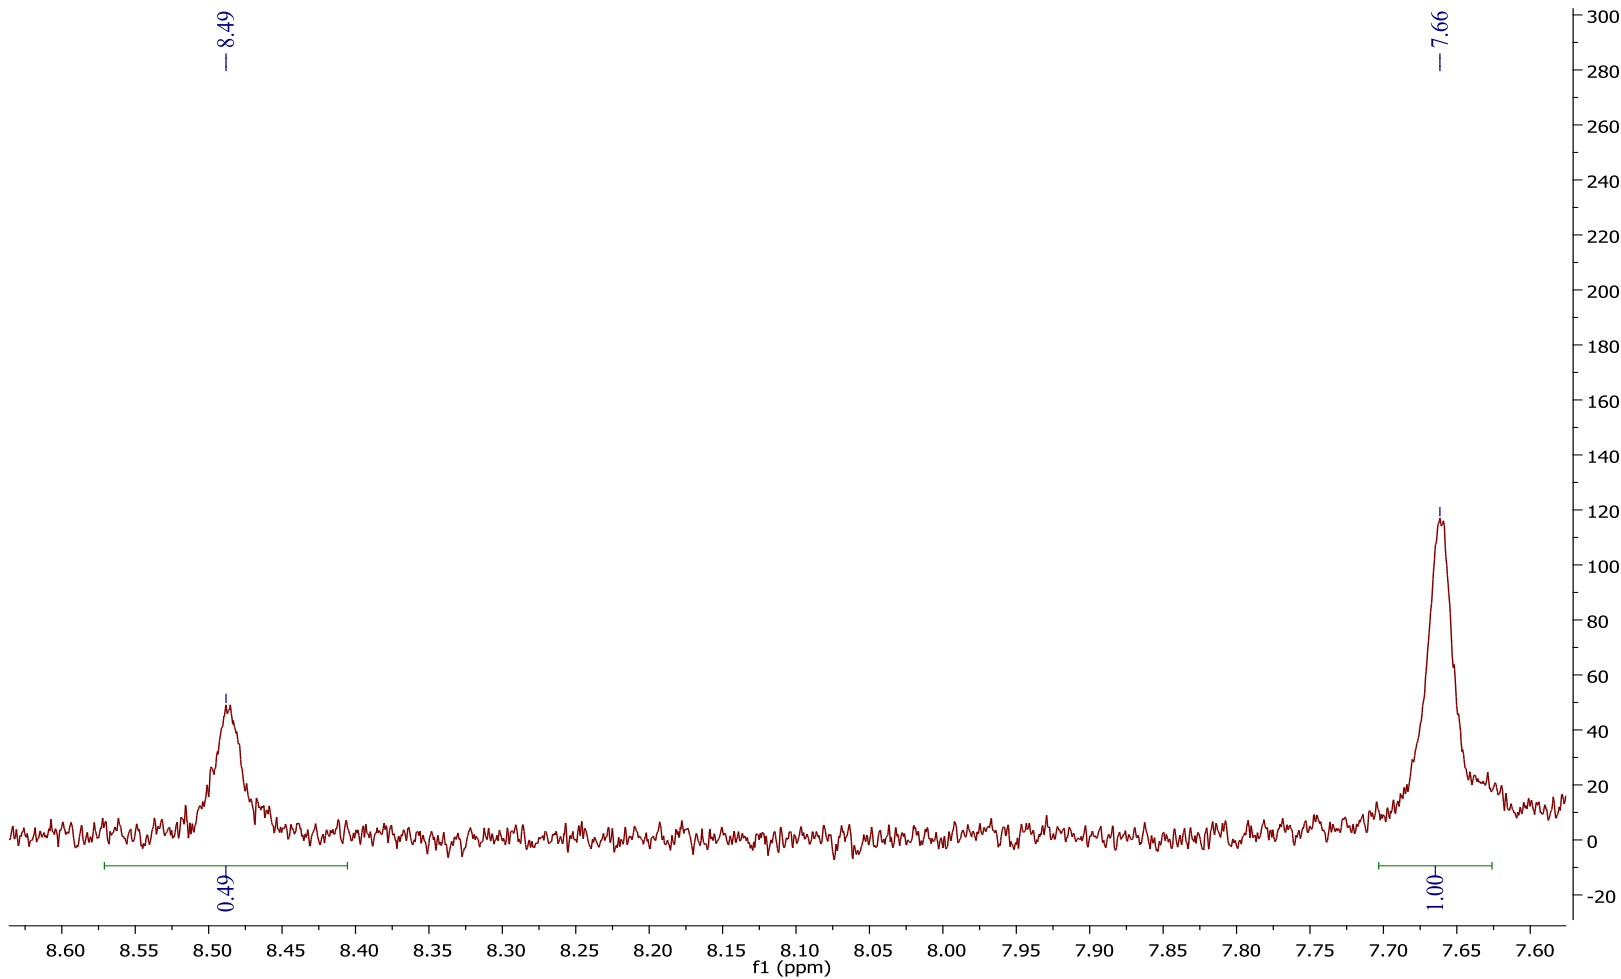

Complex **8**,  $^1\text{H}$  NMR, 400 MHz,  $\text{CD}_2\text{Cl}_2$ , 183 K

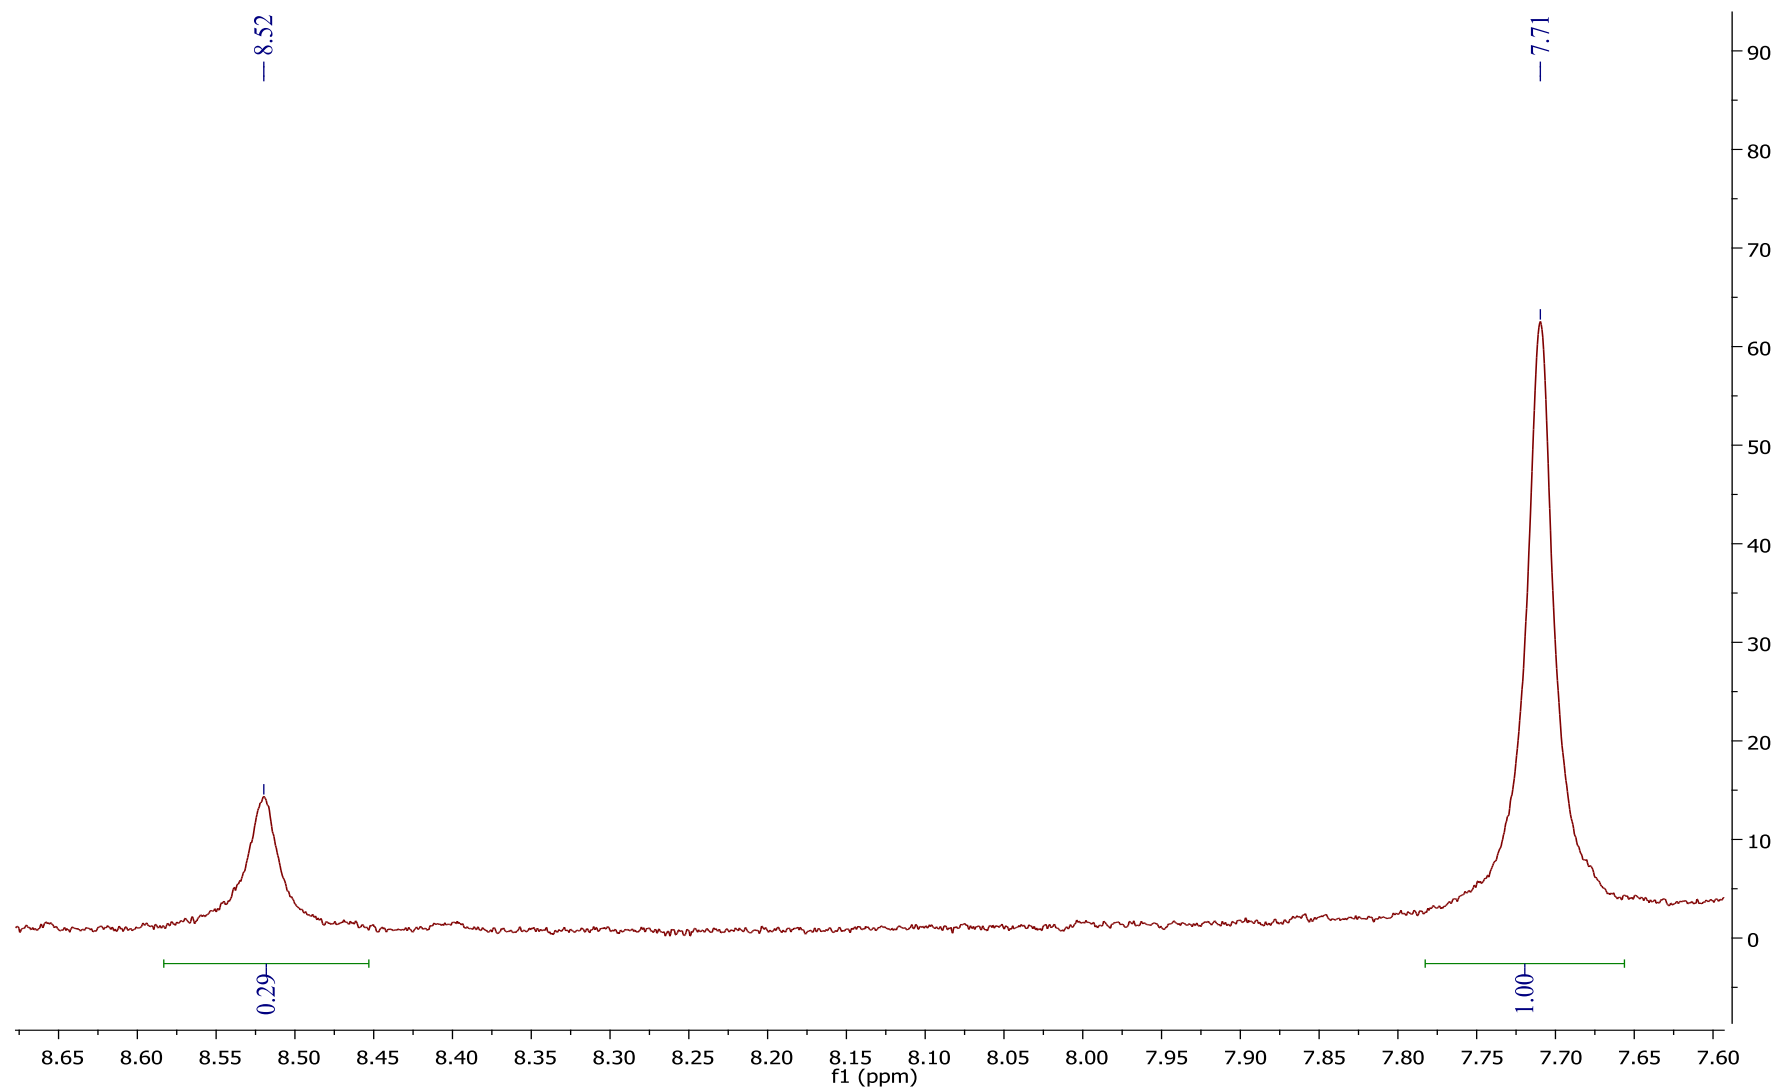

Complex **9**,  $^1\text{H}$ , 400 MHz,  $\text{CD}_2\text{Cl}_2$ , 183 K

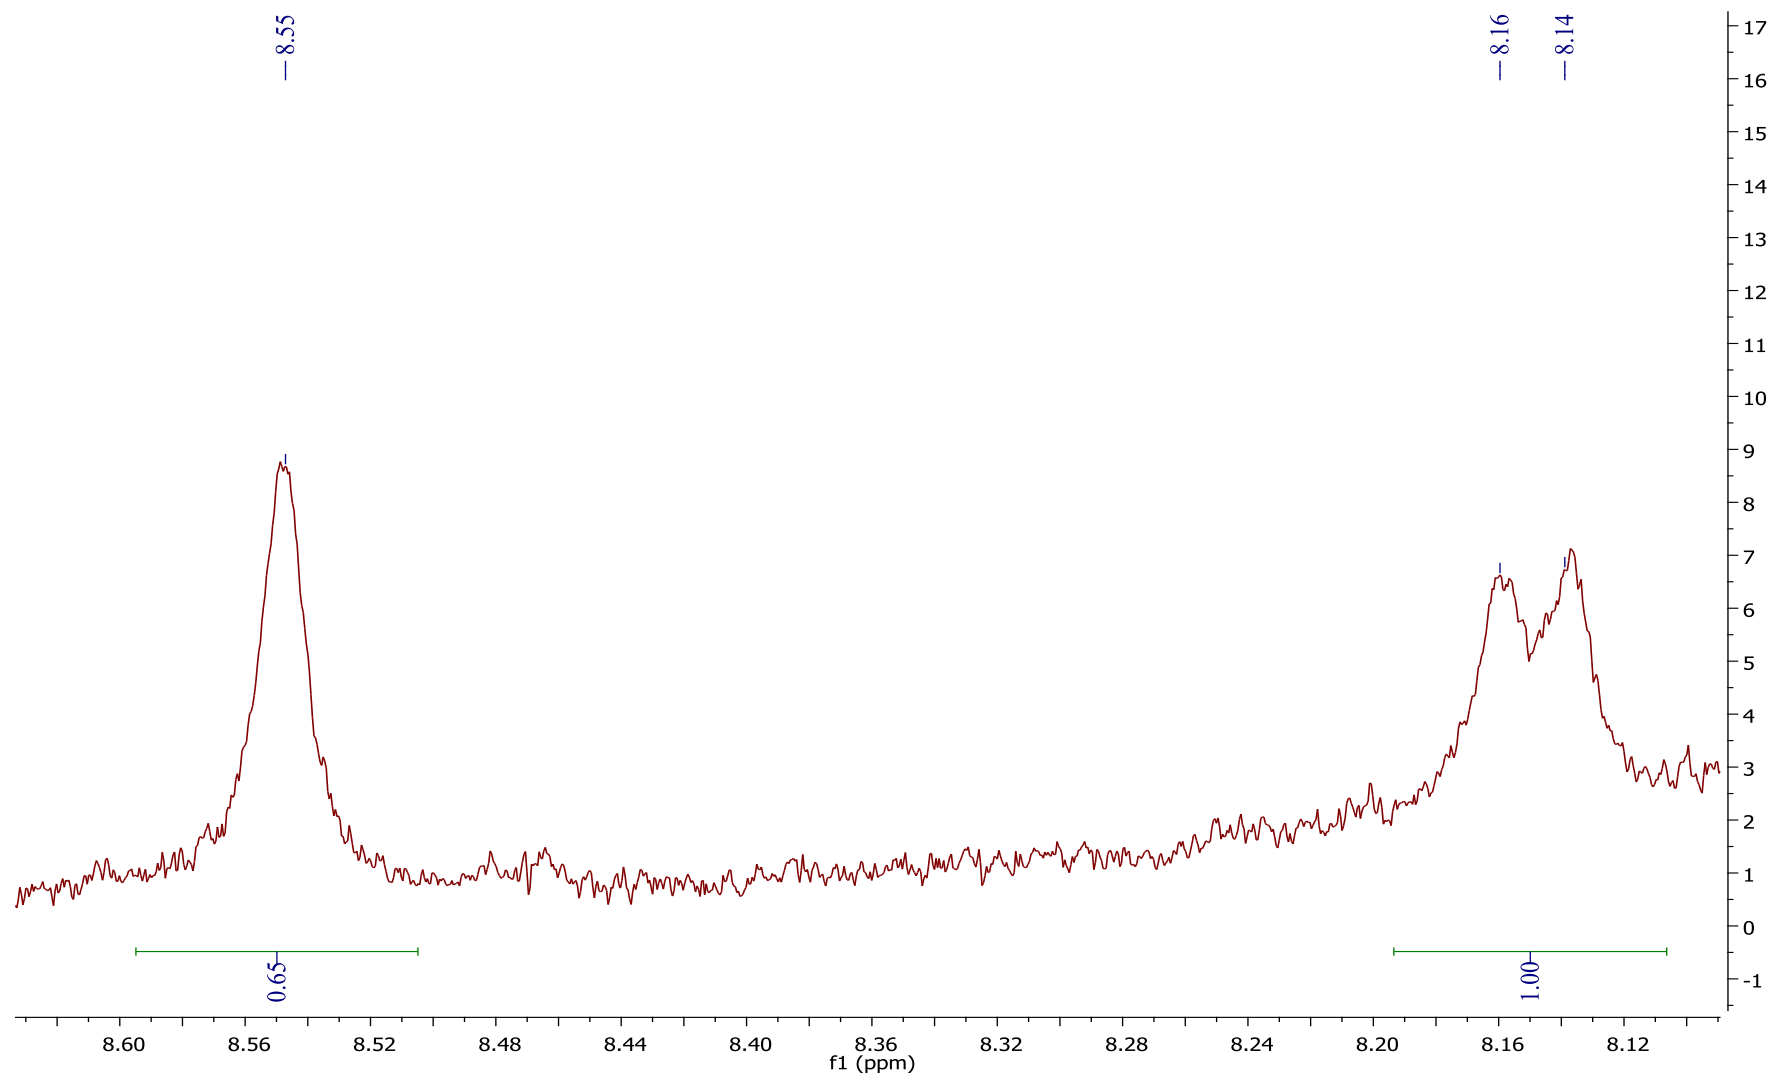

Complex **10**,  $^1\text{H}$  NMR, 300 MHz,  $\text{CD}_2\text{Cl}_2$ , 183 K

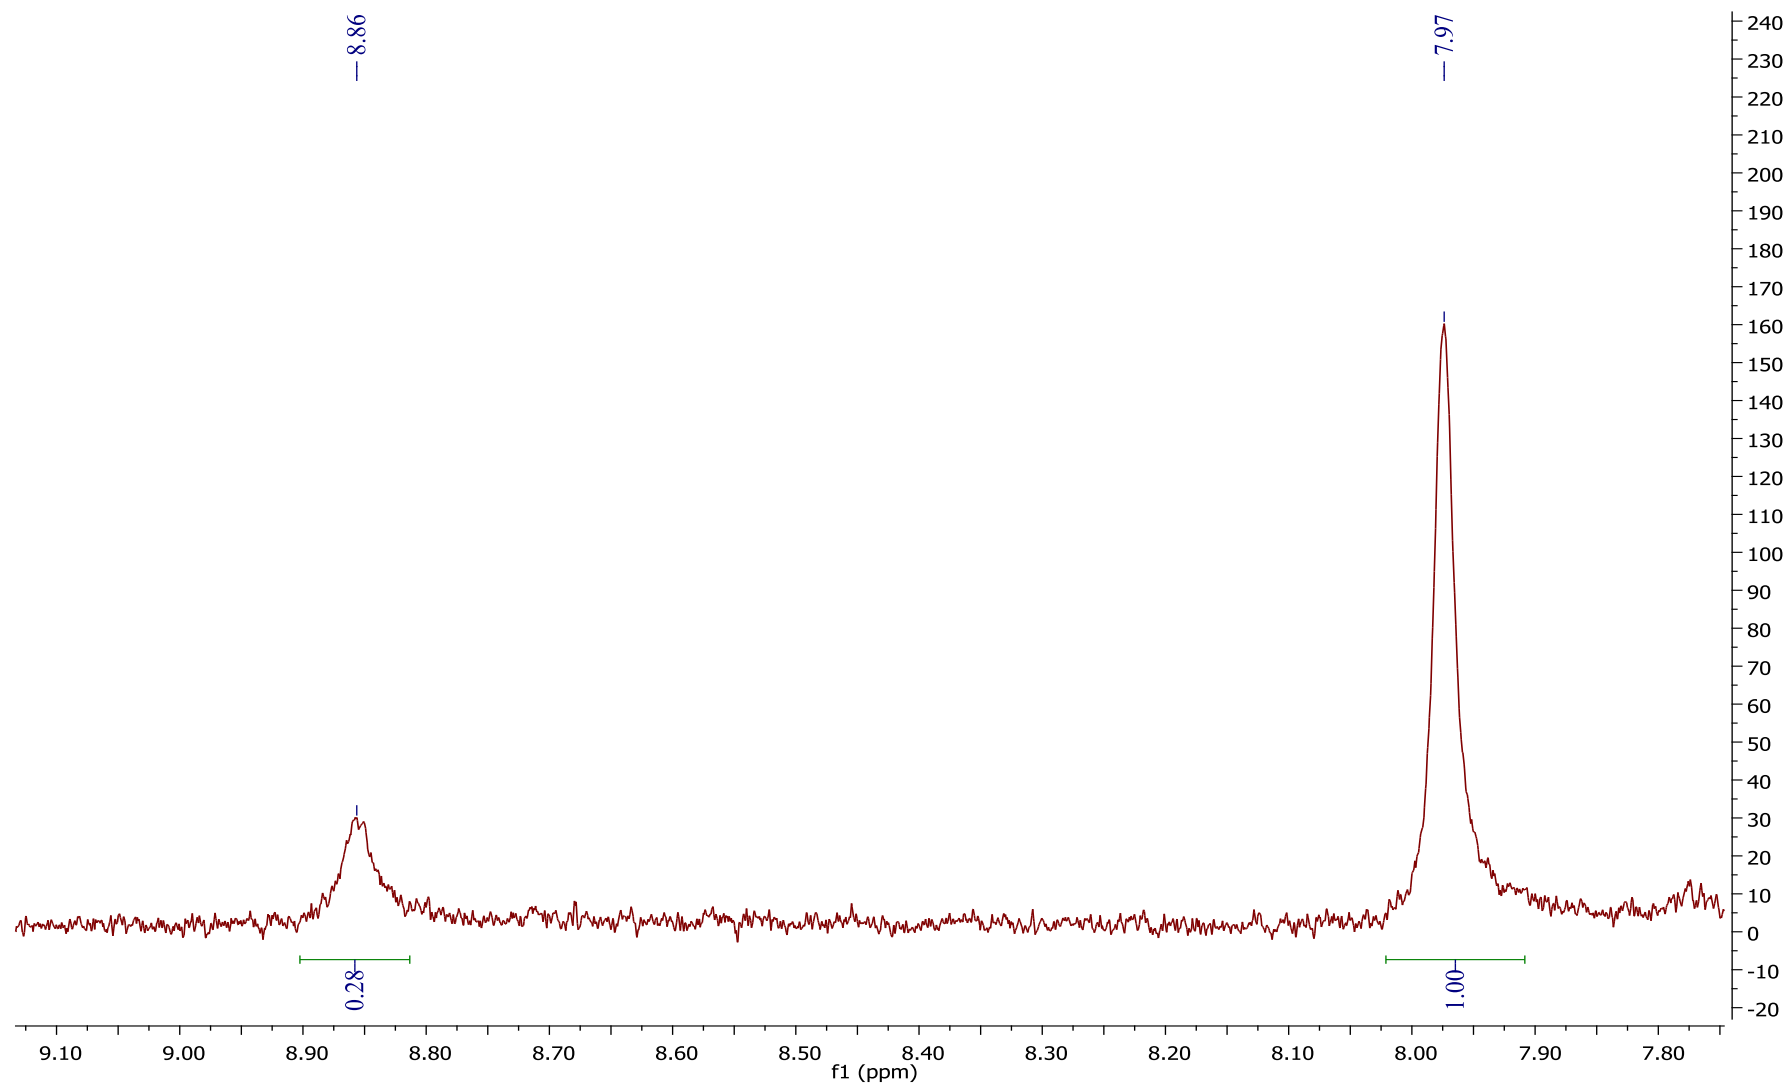

Complex **11**,  $^1\text{H}$  NMR, 400 MHz,  $\text{CD}_2\text{Cl}_2$ , 193 K

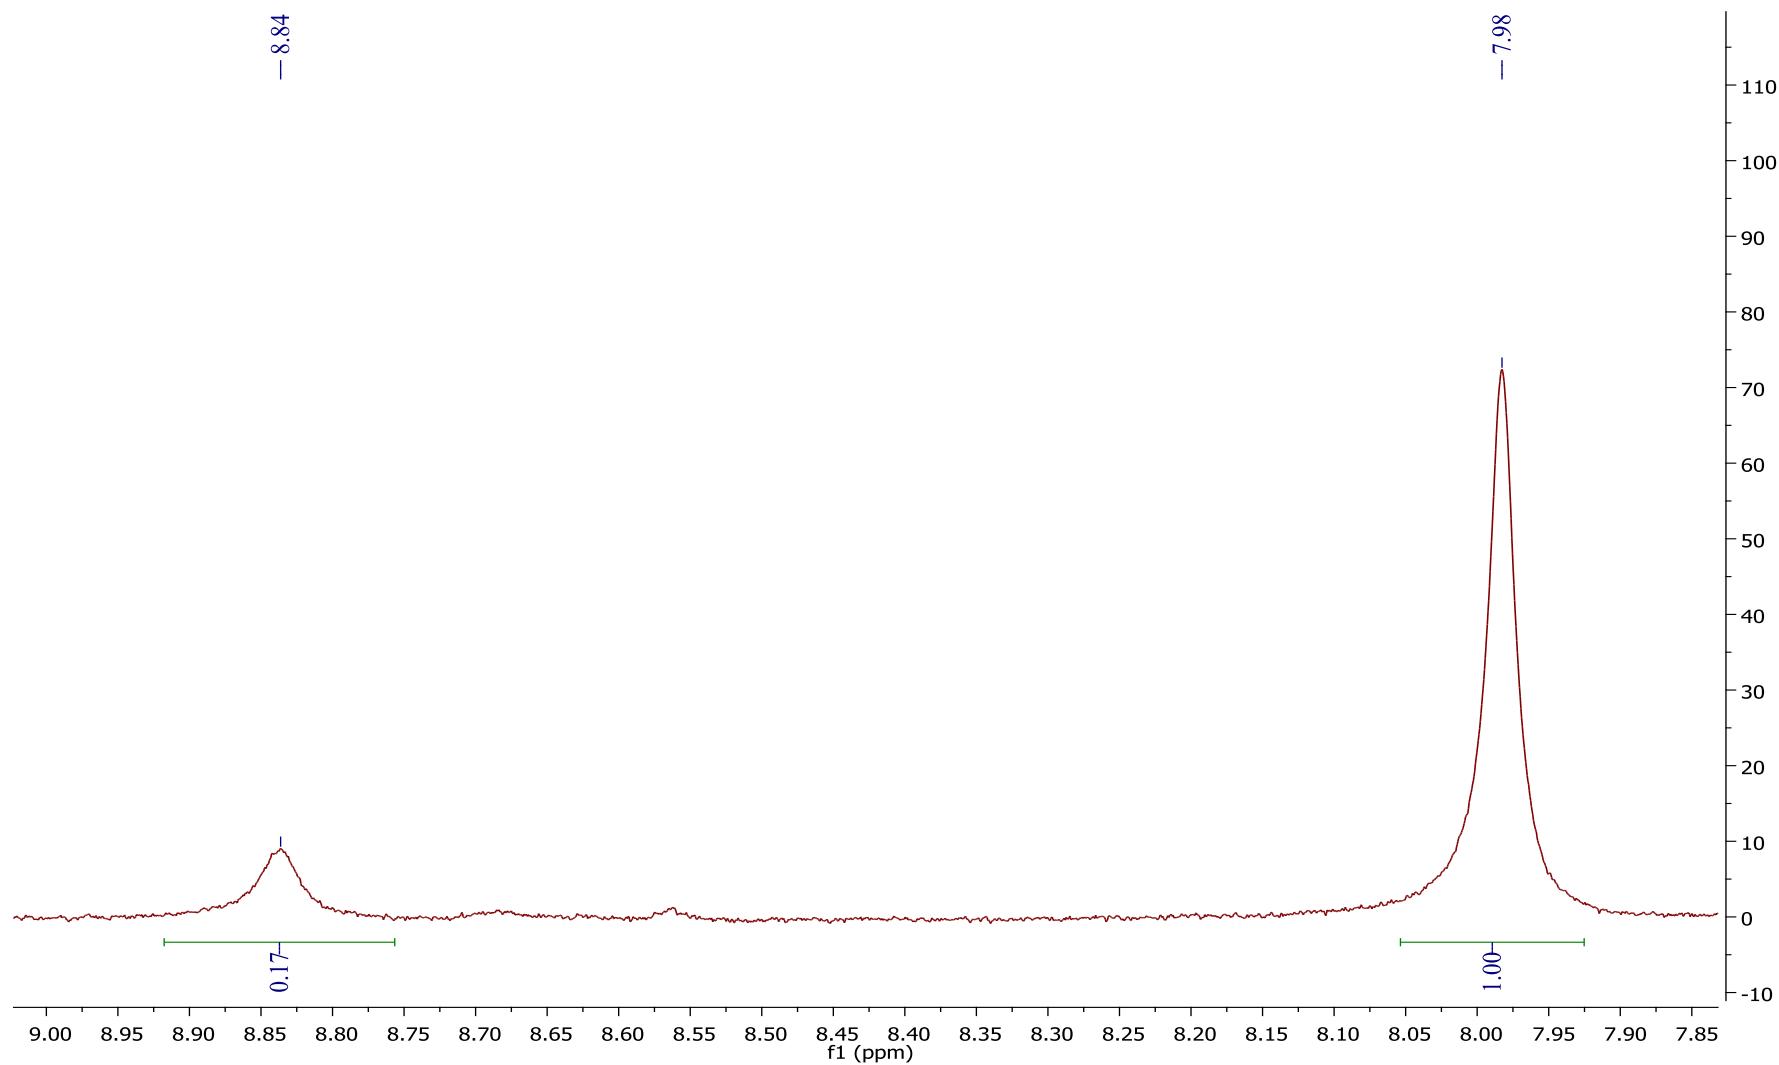

Complex **12**,  $^1\text{H}$  NMR, 400 MHz,  $\text{CD}_2\text{Cl}_2$ , 223 K

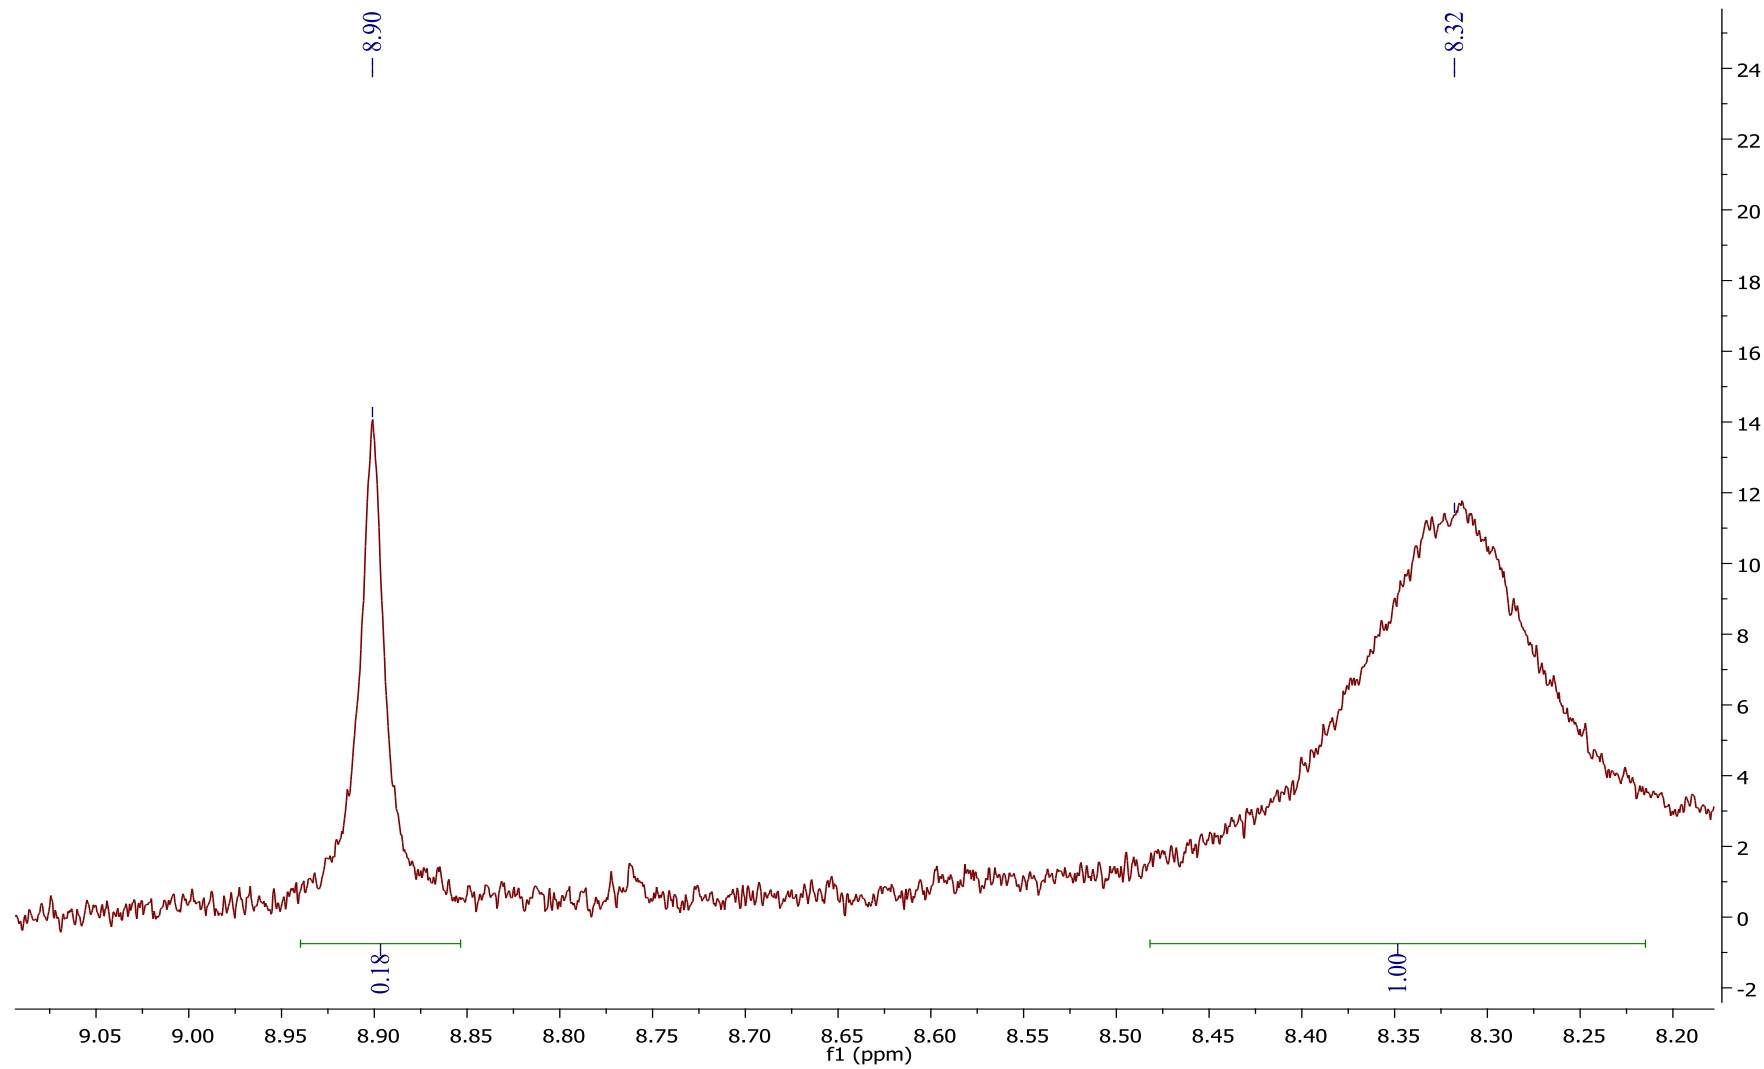

## Crystallographic data

Molecular structure of the epimers **4b** and **6b** of complexes **4** and **6**. Only hydrogen atoms bonded to the stereogenic centres and to the iminic carbon C(45) have been represented.

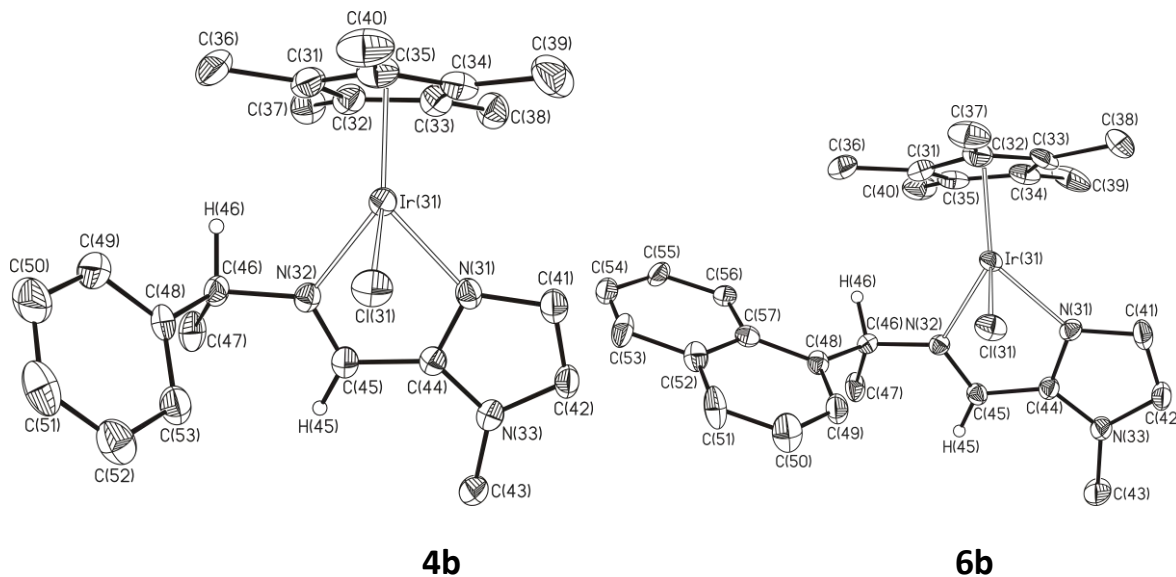

Molecular structure of the cation of complex **10**

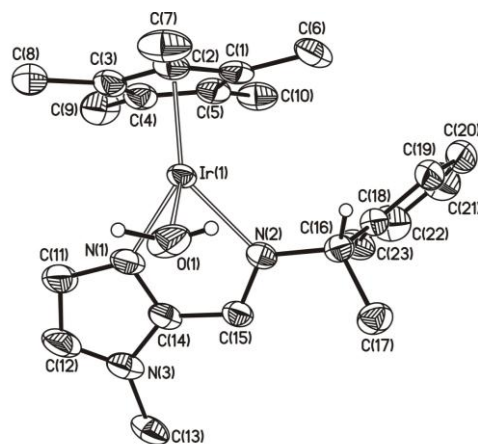

Supplement: c3dt51222c.pdf [file c3dt51222c.pdf]
